# Supplementary material for: Genetic variants of Toll-like receptor 9 are associated with susceptibility to systemic lupus erythematosus in Han Chinese female patients
Source: PeerJ. 2025 Aug 13;13:e19847. doi: 10.7717/peerj.19847 (PMC12357549; doi:10.7717/peerj.19847)
Supplement: Supplemental Information 3 — The genomic DNA obtained from all participants was subjected to genotyping for three distinct TLR9 SNPs using SSP-PCR. The genotyping results are detailed in Fig. S1. [file peerj-13-19847-s003.xlsx]

## Sheet: Sheet1
SLE Cases	rs352139	rs5743836	rs352140		Healthy Controls	rs352139	rs5743836	rs352140
S1	G A	T T	C C		H1	A A	T T	C C
S2	G G	T T	T T		H2	G G	T T	C T
S3	G G	T T	T T		H3	G A	T T	C C
S4	G A	T T	C T		H4	A A	T T	C T
S5	A A	T T	C T		H5	G G	T T	C C
S6	G G	T T	C T		H6	A A	T T	C C
S7	G G	T T	C T		H7	A A	T T	C T
S8	G G	T T	T T		H8	G A	T T	C T
S9	G A	T T	C T		H9	G A	T T	C T
S10	G A	T T	T T		H10	G A	T T	C T
S11	G A	T T	C T		H11	A A	T T	C C
S12	G G	T T	T T		H12	G A	T T	T T
S13	G A	T T	C C		H13	G A	T T	C T
S14	G A	T T	C C		H14	G A	T T	C T
S15	A A	T T	C C		H15	G A	T T	C T
S16	G A	T T	C C		H16	G A	T T	C C
S17	G A	C T	C C		H17	G A	T T	C C
S18	G G	T T	C C		H18	A A	T T	C T
S19	G A	T T	C T		H19	A A	T T	C T
S20	G A	T T	C T		H20	G A	T T	C C
S21	G G	T T	C T		H21	A A	T T	C T
S22	A A	T T	T T		H22	G A	T T	C T
S23	G G	T T	C T		H23	G A	C T	C C
S24	G A	T T	C T		H24	G A	T T	C T
S25	G A	T T	T T		H25	A A	T T	C T
S26	A A	T T	C C		H26	G A	T T	C T
S27	G A	T T	C T		H27	G A	T T	C T
S28	G A	T T	C T		H28	A A	T T	C C
S29	G G	C T	T T		H29	G A	T T	C T
S30	A A	T T	C C		H30	A A	T T	C C
S31	G A	T T	C T		H31	G A	T T	C T
S32	A A	T T	C C		H32	A A	T T	C C
S33	G A	T T	C T		H33	A A	T T	C C
S34	G A	T T	C T		H34	A A	T T	C C
S35	G A	T T	C T		H35	G A	T T	C T
S36	A A	T T	C C		H36	A A	T T	C C
S37	G A	T T	C T		H37	A A	T T	C C
S38	G A	T T	T T		H38	A A	T T	C C
S39	G A	T T	C T		H39	G A	T T	C T
S40	A A	T T	C C		H40	G A	T T	C T
S41	A A	T T	C C		H41	A A	T T	C C
S42	G A	T T	T T		H42	G A	T T	C T
S43	G A	T T	C T		H43	G G	T T	C T
S44	A A	T T	C C		H44	A A	T T	C C
S45	G A	T T	C T		H45	G G	T T	T T
S46	G A	T T	C T		H46	G A	T T	C T
S47	G G	T T	C T		H47	G A	T T	C T
S48	G A	T T	T T		H48	G A	T T	C T
S49	G A	T T	T T		H49	A A	T T	C C
S50	A A	T T	C C		H50	A A	T T	C C
S51	A A	T T	C C		H51	A A	T T	C C
S52	G A	T T	T T		H52	G A	T T	C T
S53	G G	T T	C T		H53	G G	T T	T T
S54	G A	T T	C C		H54	G A	T T	C T
S55	G G	T T	T T		H55	G G	T T	T T
S56	G G	T T	T T		H56	G G	T T	C T
S57	G A	T T	C T		H57	G G	T T	T T
S58	A A	T T	C C		H58	A A	T T	C C
S59	A A	T T	C C		H59	G A	T T	C T
S60	G A	T T	C T		H60	A A	T T	C T
S61	G A	T T	C T		H61	A A	T T	C C
S62	G A	T T	C T		H62	A A	T T	C C
S63	G A	T T	C C		H63	G A	T T	C T
S64	G A	T T	T T		H64	G A	T T	C T
S65	G A	T T	C C		H65	G A	T T	C T
S66	G A	T T	C T		H66	G A	T T	C T
S67	G A	T T	C C		H67	A A	T T	C C
S68	G A	T T	T T		H68	G A	T T	C T
S69	G A	T T	C T		H69	G A	T T	C T
S70	G A	T T	C C		H70	A A	T T	C C
S71	G A	T T	C C		H71	G G	T T	T T
S72	G A	T T	C T		H72	A A	T T	C C
S73	G A	T T	T T		H73	G G	T T	C T
S74	A A	T T	C C		H74	A A	T T	C C
S75	G G	T T	T T		H75	A A	T T	C C
S76	G A	T T	C T		H76	G G	T T	T T
S77	A A	T T	C C		H77	A A	T T	C C
S78	G G	T T	T T		H78	A A	T T	C C
S79	G G	T T	T T		H79	G G	T T	C C
S80	G A	T T	C C		H80	G A	T T	C T
S81	G A	T T	C T		H81	G A	T T	C T
S82	G A	T T	C T		H82	A A	T T	C C
S83	A A	C C	C C		H83	G A	T T	T T
S84	G G	T T	T T		H84	G A	T T	C T
S85	G A	T T	C T		H85	G A	T T	C C
S86	G A	T T	C T		H86	A A	T T	C T
S87	A A	T T	C C		H87	G G	T T	T T
S88	G G	T T	T T		H88	A A	T T	C T
S89	A A	T T	C C		H89	G A	T T	C T
S90	G A	T T	C T		H90	A A	T T	C C
S91	G G	T T	T T		H91	A A	T T	C C
S92	G G	T T	T T		H92	G A	T T	C T
S93	G A	T T	C T		H93	G A	T T	C T
S94	G G	T T	T T		H94	A A	T T	C C
S95	A A	T T	C C		H95	A A	T T	C C
S96	A A	T T	C C		H96	G A	T T	C T
S97	A A	T T	C C		H97	A A	T T	C C
S98	G G	T T	T T		H98	A A	T T	C C
S99	G A	T T	C T		H99	G A	T T	C T
S100	G A	T T	C T		H100	G A	T T	C T
S101	G A	T T	C T		H101	G A	T T	C T
S102	A A	T T	C C		H102	G G	T T	T T
S103	A A	T T	C C		H103	A A	T T	C C
S104	G G	C T	T T		H104	A A	T T	C C
S105	A A	T T	C C		H105	G A	T T	C T
S106	G A	T T	C T		H106	A A	T T	C C
S107	A A	T T	C C		H107	A A	T T	C C
S108	A A	T T	C C		H108	G G	T T	T T
S109	A A	T T	C C		H109	G A	T T	C T
S110	A A	T T	C C		H110	A A	T T	C C
S111	G A	T T	C T		H111	G A	T T	C C
S112	A A	T T	C C		H112	G G	T T	T T
S113	A A	T T	C C		H113	A A	T T	C C
S114	G A	T T	C T		H114	G A	T T	C T
S115	G A	T T	C T		H115	G A	T T	C T
S116	A A	T T	C C		H116	A A	T T	C C
S117	A A	T T	C C		H117	G A	T T	C T
S118	A A	T T	C C		H118	G A	T T	C C
S119	G A	T T	C T		H119	G A	T T	C C
S120	G A	T T	C T		H120	G A	T T	C T
S121	G G	T T	T T		H121	A A	T T	C C
S122	A A	T T	C C		H122	A A	T T	C C
S123	A A	T T	C C		H123	G A	T T	C C
S124	A A	T T	C C		H124	G A	T T	C C
S125	A A	T T	C C		H125	G A	T T	C T
S126	A A	T T	C C		H126	G A	T T	C C
S127	G A	T T	C T		H127	G G	T T	C T
S128	A A	T T	C C		H128	A A	T T	C T
S129	A A	T T	C C		H129	A A	T T	C T
S130	G A	T T	C T		H130	G G	T T	C T
S131	G A	T T	C T		H131	A A	T T	C C
S132	A A	T T	C C		H132	G A	T T	C T
S133	A A	T T	C C		H133	A A	T T	C C
S134	A A	T T	C C		H134	G A	T T	C T
S135	G A	T T	C T		H135	G A	T T	C T
S136	G A	T T	C T		H136	G A	T T	T T
S137	G G	T T	T T		H137	G G	T T	T T
S138	A A	T T	C C		H138	A A	T T	C C
S139	G A	T T	C T		H139	G A	T T	C T
S140	G A	T T	C T		H140	A A	T T	C T
S141	A A	T T	C T		H141	A A	T T	C T
S142	G A	T T	C T		H142	G A	T T	C T
S143	G A	T T	C T		H143	G A	T T	C T
S144	G A	T T	C T		H144	G A	T T	T T
S145	A A	T T	C C		H145	G A	T T	C T
S146	A A	T T	C C		H146	G G	T T	C T
S147	G G	T T	T T		H147	A A	T T	C T
S148	G G	T T	T T		H148	A A	T T	C C
S149	G A	T T	C T		H149	G A	T T	C T
S150	G G	T T	T T		H150	A A	C T	C C
					H151	G G	T T	T T
